# Supplementary material
Source: Springer Nature journal article supplement (https://www.springermedizin.de/resource/supplementary/12931_2012_1241_MOESM4_ESM.pdf/9425826)

A)

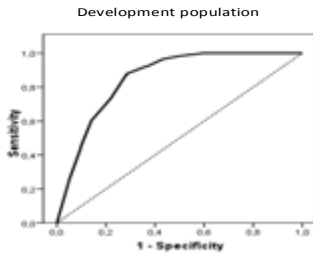

AUC: 0,85 (CI95% 0,82-0,88)  
Sensitivity: 74,1% (CI95% 65.5-82.7%)  
Specificity: 77.5% (CI95% 74.2-80.6%)

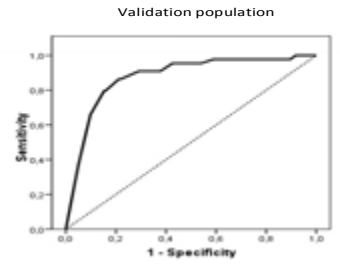

AUC: 0,87 (CI95% 0,82-0,93)  
Sensitivity: 86,1% (CI95% 74.5-97.6%)  
Specificity: 78% (CI95% 73.6-82.4%)

B)

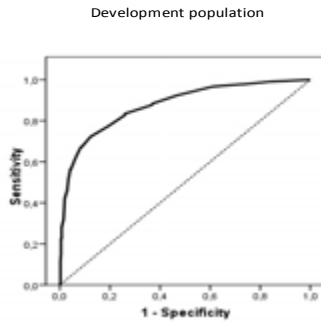

AUC: 0,88 (CI95% 0,85-0,90)  
Sensitivity: 73,1% (CI95% 68.7-77.5%)  
Specificity: 88.2% (CI95% 84.9-91.6%)

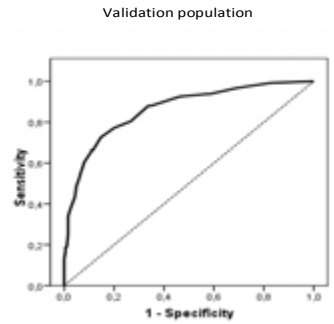

AUC: 0,86 (CI95% 0,83-0,90)  
Sensitivity: 72,9% (CI95% 66.9-78.9%)  
Specificity: 85.3% (CI95% 79.8-90.8%)

C)

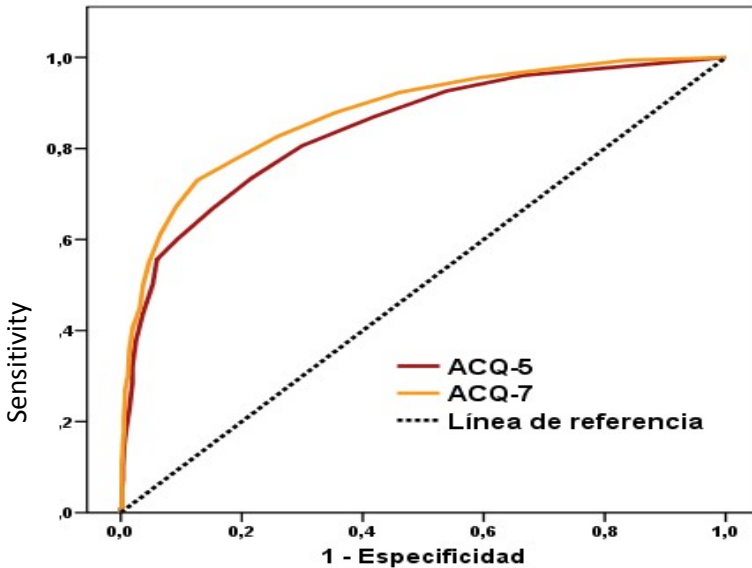

Supplement: MOESM4 [file 9425826]
